# Supplementary material
Source: publisher site journal article supplement (https://www.dovepress.com/get_supplementary_file.php?f=492158.docx)
Supplement: Supplementary file 1 [file get_supplementary_file.php]

Supplementary Table1. Diagnosis criteria for stage 5 Chronic kidney disease and dialysis a

| *Markers of kidney damage* |
| --- |
| 1. albuminuria (UAER≥30mg/24h or UACR≥30mg/g); |
| 2. abnormal urine sediment; |
| 3. tubular-related lesions; |
| 4. histological abnormalities; |
| 5. structural abnormalities seen on imaging; |
| 6. history of kidney transplantation; |
| 7. eGFR＜15ml·min-1·（1.73m2）-1 |
| *General indications for HD* |
| The patient presents with clinical manifestations and signs of uremia, with an eGFR decline to 5-8ml·min-1·（1.73m2）-1 |

NOTE: UAER, Urinary albumin excretion rate; UACR, Urine albumin-to-creatinine ratio; eGFR, estimated glomerular filtration rate

1. Referring to the diagnostic criteria for stage 5 chronic kidney disease (end-stage renal disease) and the general clinical indications for HD in the "Guidelines for Early Screening, Diagnosis and Prevention of Chronic Kidney Disease (2022 version)
